# Supplementary material for: Expression of microRNA-155 in thalassemic erythropoiesis
Source: PeerJ. 2024 Sep 20;12:e18054. doi: 10.7717/peerj.18054 (PMC11418816; doi:10.7717/peerj.18054)
Supplement: Data S1 [file peerj-12-18054-s003.xlsx]

## Sheet: Sheet1
Figure 1. In vivo expression of miR-155 during erythropoiesis in β-thalassemic mice.
Quantitative RT-PCR of (C) miR-155 was determined in WT, thalassemic mice normalized by the expression of let-7a (2-ΔCt)
				△ Ct mean
	sample	Averag let7a Cq	Average miR-155 Cq	Cq miR-155- Cq let7a	2^(-△ Ct)
WT_1	CD45-/CD71+/Ter119+	28.32	35.0533	6.7333	0.0098
	CD45-/CD71-/Ter119+	31.2467	38.7733	7.5267	0.0076
WT_2	CD45-/CD71+/Ter119+	27.22	32.4233	5.2033	0.0277
	CD45-/CD71-/Ter119+	30.2733	36.545	6.2717	0.0139
WT_3	CD45-/CD71+/Ter119+	26.88	31.86	4.98	0.0317
	CD45-/CD71-/Ter119+	26.9067	32.45	5.5433	0.0215
Thal_1	CD45-/CD71+/Ter119+	28.1367	32.1667	4.0222	0.0619
	CD45-/CD71-/Ter119+	28.6867	32.38	3.6822	0.0786
Thal_2	CD45-/CD71+/Ter119+	28.0367	32.02	3.9922	0.0634
	CD45-/CD71-/Ter119+	28.0467	31.44	3.3756	0.0966
Thal_3	CD45-/CD71+/Ter119+	27.3667	31.4233	4.0722	0.0595
	CD45-/CD71-/Ter119+	32.8833	36.225	3.3417	0.0995
Figure 2. Proliferation and differentiation of erythroblast and expression of miR-155 during in vitro erythropoiesis in β-thalassemic mice.
Quantitative RT-PCR of miR-155 was determined in WT, thalassemic mice normalized by the expression of snoRNA202 (2-ΔCt).
				△ Ct mean
	sample	AveragsnoRNA202 Cq	Average miR-155 Cq	Cq miR-155- Cq snoRNA202	2^(-△ Ct)
WT_1	day 0	17.42	20.71	3.29	0.1022
	day 1	14.54	23.535	8.995	0.002
	day 2	18.725	27.86	9.135	0.0018
WT_2	day 0	19.135	23.02	3.885	0.0691
	day 1	17.1233	21.8733	4.75	0.0379
	day 2	19.225	27.0233	7.7983	0.0047
WT_3	day 0	18.0633	22.0967	4.0333	0.062
	day 1	19.55	23.9167	4.3667	0.0491
	day 2	20.46	27.3133	6.8533	0.0088
Thal_1	day 0	19.635	21.86	2.225	0.2144
	day 1	16.265	19.08	2.815	0.1452
	day 2	17	18.45	1.45	0.366
Thal_2	day 0	17.74	22.09	4.35	0.04921
	day 1	17.265	19.08	1.815	0.2904
	day 2	19.87	20.57	0.7	0.6156
Thal_3	day 0	17.91	21.91	4	0.0625
	day 1	18.92	20.134	1.214	0.4654
	day 2	19.89	19.66	-0.23	1.1728
Figure 3. Functional effects of miR-155 expression in presence of miR-155 -mimic and anti-miR-155 inhibitor.
Quantitative RT-PCR of miR-155 was determined in WT, thalassemic mice after transfection with miRNA-mimic and anti-miR-155 inhibitor in comparison between untreated, negative control and miRNA-mimic or anti-miR-155 inhibitor
				△ Ct mean
	sample	AveragsnoRNA202 Cq	Average miR-155 Cq	Cq miR-155- Cq snoRNA202	2^(-△ Ct)
Transfect with miRNA-mimic
WT_1	Untreated	18.99	27.39	8.395	0.003
	negative control	20.6	29.03	8.435	0.0029
	miRNA-mimic	18.79	12.41	-6.38	83.2859
WT_2	Untreated	19.26	27.56	8.295	0.0032
	negative control	20.33	28.45	8.115	0.0036
	miRNA-mimic	18.89	12.96	-5.93	60.9688
WT_3	Untreated	19.13	27.47	8.345	0.0031
	negative control	20.47	28.74	8.275	0.0032
	miRNA-mimic	18.85	12.69	-6.155	71.259
Thal_1	Untreated	19.35	27.01	7.655	0.005
	negative control	19.57	27.49	7.915	0.0041
	miRNA-mimic	18.89	11.77	-7.12	139.102
Thal_2	Untreated	18.92	26.76	7.835	0.0044
	negative control	19.46	27.34	7.875	0.0043
	miRNA-mimic	18.83	11.44	-7.39	167.73
Thal_3	Untreated	19.14	26.88	7.745	0.0047
	negative control	19.52	27.41	7.895	0.0042
	miRNA-mimic	18.87	11.61	-7.26	152.747
Transfect with anti-miR-155 inhibitor
WT_1	Untreated	16.38	26.31	9.93	0.001
	negative control	17.93	27.48	9.545	0.0013
	anti-miR-155 inhibitor	16.76	27.65	10.885	0.00053
WT_2	Untreated	16.34	26.64	10.3	0.0008
	negative control	18.16	27.47	9.305	0.0016
	anti-miR-155 inhibitor	16.65	27.57	10.915	0.00052
WT_3	Untreated	16.37	26.48	10.115	0.0009
	negative control	18.05	27.47	9.425	0.0015
	anti-miR-155 inhibitor	16.72	27.62	10.9	0.00052
Thal_1	Untreated	19.98	26.35	6.37	0.0121
	negative control	19.27	25.49	6.22	0.0135
	anti-miR-155 inhibitor	17.68	26.75	9.07	0.0019
Thal_2	Untreated	20.48	27.08	6.6	0.0103
	negative control	19.5	26.47	6.97	0.008
	anti-miR-155 inhibitor	17.28	26.7	9.42	0.0015
Thal_3	Untreated	20.24	26.72	6.485	0.0112
	negative control	19.37	25.96	6.59	0.0104
	anti-miR-155 inhibitor	17.49	26.73	9.245	0.0016
Figure 4. Expression of c-myc in presence of miR-155-mimic.
Quantitative RT-PCR of target mRNA of miR-155, c-myc, bach1 and pu-1 was determined in WT, thalassemic mice after transfection with miRNA-mimic in comparison between untreated, negative control and miRNA-mimic. This data was normalized by the expression of β-actin (Actb) (2-ΔΔCt).
				△ Ct mean					△ Ct mean					△ Ct mean
	sample	Average β-actin Cq	Average c-myc Cq	Cq c-myc - Cq β-actin	2^(-△ Ct)		Average β-actin Cq	Average bach1 Cq	Cq bach1 - Cq β-actin	2^(-△ Ct)		Average β-actin Cq	Average pu-1 Cq	Cq pu-1 - Cq β-actin	2^(-△ Ct)
Transfect with miRNA-mimic
WT_1	Untreated	13.72	32.15	18.43	2.8315e-06		13.72	16.6	2.88	0.135842		13.72	18.35	4.63	0.040386
	negative control	14.37	32.04	17.67	4.79513e-06		14.37	17.78	3.41	0.0940779		14.37	18.34	3.97	0.0638133
	miRNA-mimic	13.93	33.37	19.44	1.40597e-06		13.93	16.99	3.06	0.119908		13.93	17.32	3.39	0.0953912
WT_2	Untreated	14.14	32.92	18.78	2.22155e-06		14.14	17.13	2.99	0.125869		14.14	18.05	3.91	0.0665231
	negative control	13.91	31.98	18.07	3.63403e-06		13.91	17.11	3.2	0.108819		13.91	17.5	3.59	0.0830429
	miRNA-mimic	14.71	34.48	19.77	1.1185e-06		14.71	18.21	3.5	0.0883883		14.71	18.21	3.5	0.0883883
WT_3	Untreated	13.94	32.535	18.605	2.50805e-06		13.94	16.87	2.935	0.130761		13.94	18.16	4.22	0.0536603
	negative control	14.14	32.01	17.87	4.1744e-06		14.14	17.45	3.305	0.10118		14.14	18	3.86	0.0688691
	miRNA-mimic	14.32	33.93	19.605	1.25403e-06		14.32	17.6	3.28	0.102949		14.32	17.86	3.54	0.0859714
Thal_1	Untreated	12.87	32.26	19.39	1.45555e-06		12.87	17.64	4.77	0.0366511
	negative control	12.7	32.24	19.54	1.31182e-06		12.7	18.6	5.36	0.0243489
	miRNA-mimic	11.93	32.03	20.095	8.92899e-07		11.93		4.825	0.0352801
Thal_2	Untreated	12.83	31.76	18.93	2.00218e-06		12.83	17.56	4.73	0.0376815
	negative control	13.26	32.68	19.42	1.4256e-06		13.26	18.03	4.77	0.0366511
	miRNA-mimic	11.68	31.49	19.805	1.09169e-06		11.68		4.695	0.0386068
Thal_3	Untreated	12.85	32.01	19.16	1.70712e-06		12.85	17.6	4.75	0.0371627
	negative control	12.98	32.46	19.48	1.36753e-06		12.98	18.05	5.065	0.0298733
	miRNA-mimic	11.81	31.755	19.95	9.87306e-07		11.81	17.565	4.76	0.036906
Figure 5. Expression of c-myc in presence of anti-miR-155-inhibitor
Quantitative RT-PCR of target mRNA of miR-155, c-myc, bach1 and pu-1 was determined in WT, thalassemic mice after transfection with anti-miR-155 inhibitor in comparison between untreated, negative control and miRNA-mimic. This data was normalized by the expression of β-actin (Actb) (2-ΔΔCt).
Transfect with anti-miR-155 inhibitor				△ Ct mean					△ Ct mean					△ Ct mean
	sample	Average β-actin Cq	Average c-myc Cq	Cq c-myc - Cq β-actin	2^(-△ Ct)		Average β-actin Cq	Average bach1 Cq	Cq bach1 - Cq β-actin	2^(-△ Ct)		Average β-actin Cq	Average pu-1 Cq	Cq pu-1 - Cq β-actin	2^(-△ Ct)
WT_1	Untreated	11.59	30.33	18.735	2.29194e-06		15.39	20.82	5.43	0.0231957		11.59	16.23	4.635	0.0402463
	negative control	11.83	30.36	18.525	2.65106e-06		16.35	21.3	4.945	0.0324643		11.83	17.59	5.755	0.0185171
	anti-miR-155 inhibitor	12.49	30.39	17.9	4.08849e-06		16.58	21.81	5.225	0.0267373		12.49	16.99	4.5	0.0441942
WT_2	Untreated	11.92	31.14	19.215	1.64327e-06		15.48	20.52	5.04	0.0303955		11.92	16.63	4.705	0.0383402
	negative control	12.5	31.11	18.605	2.50805e-06		16.84	21.78	4.935	0.0326902		12.5	17.56	5.055	0.0300811
	anti-miR-155 inhibitor	12.51	30.91	18.4	2.891e-06		16.45	21.68	5.225	0.0267373		12.51	17.75	5.24	0.0264608
WT_3	Untreated	11.76	30.73	18.975	1.94069e-06		15.48	20.72	5.235	0.0265527		11.76	16.77	5.005	0.0311419
	negative control	12.17	30.73	18.565	2.57857e-06		16.6	21.54	4.94	0.0325771		12.17	17.95	5.775	0.0182621
	anti-miR-155 inhibitor	12.5	30.65	18.15	3.438e-06		16.52	21.74	5.225	0.0267373		12.5	17.37	4.87	0.0341967
Thal_1	Untreated	12.57	32.47	19.9	1.02212e-06		17.59	21.22	3.63	0.0807721		17.59	21.56	3.97	0.0638133
	negative control	11.86	31.75	19.915	1.01155e-06		16.83	20.96	4.13	0.0571145		16.83	20.88	4.05	0.060371
	anti-miR-155 inhibitor	12.52	30.39	17.865	4.18889e-06		18.54	22.42	3.875	0.0681567		18.54	21.92	3.375	0.0963882
Thal_2	Untreated	12.61	32	19.39	1.45555e-06		17.79	21.48	3.69	0.0774817		17.79	21.96	4.17	0.0555527
	negative control	11.87	32.01	20.135	8.68482e-07		16.89	20.46	3.57	0.0842021		16.89	21.07	4.18	0.0551689
	anti-miR-155 inhibitor	12.37	29.87	17.495	5.41353e-06		18.53	22.4	3.865	0.0686308		18.53	21.89	3.355	0.0977337
Thal_3	Untreated	12.59	32.235	19.645	1.21974e-06		17.79	21.45	3.66	0.0791098		17.79	21.86	4.07	0.0595399
	negative control	11.87	31.89	20.025	9.37291e-07		16.86	20.71	3.85	0.0693481		16.86	20.975	4.115	0.0577114
	anti-miR-155 inhibitor	12.45	30.125	17.68	4.762e-06		18.54	22.41	3.87	0.0683934		18.54	21.9	3.365	0.0970586
