# Supplementary material for: Expression of microRNA-155 in thalassemic erythropoiesis
Source: PeerJ. 2024 Sep 20;12:e18054. doi: 10.7717/peerj.18054 (PMC11418816; doi:10.7717/peerj.18054)
Supplement: Supplemental Information 2 [file peerj-12-18054-s002.xls]

## Sheet: Sheet1
ITEM TO CHECK	IMPORTANCE	CHECKLIST
EXPERIMENTAL DESIGN
Definition of experimental and control groups	E	line 98-99, 159-161
Number within each group	E	line 98-99, 116,127,161-162
Assay carried out by core lab or investigator's lab?	D	ND
Acknowledgement of authors' contributions	D	line 370-377
SAMPLE
Description	E	line 98-103
Volume/mass of sample processed	D	ND
Microdissection or macrodissection	E	line 116, 127-128
Processing procedure	E	line 169-198
If frozen - how and how quickly?	E	ND
If fixed - with what, how quickly?	E	ND
Sample storage conditions and duration (especially for FFPE samples)	E	line 117
NUCLEIC ACID EXTRACTION
Procedure and/or instrumentation	E	line 169-174
Name of kit and details of any modifications	E	line 171-172
Source of additional reagents used	D	ND
Details of DNase or RNAse treatment	E	line 171-172
Contamination assessment (DNA or RNA)	E	line 172-174
Nucleic acid quantification	E	line 172-174
Instrument and method	E	line 172-174
Purity (A260/A280)	D	line 172-174
Yield	D	ND
RNA integrity method/instrument	E	line 172-174
RIN/RQI or Cq of 3' and 5' transcripts	E	line 172-174
Electrophoresis traces	D	ND
Inhibition testing (Cq dilutions, spike or other)	E	line 172-174
REVERSE TRANSCRIPTION
Complete reaction conditions	E	line 174-175, 184-186
Amount of RNA and reaction volume	E	line 174-175, 184-186
Priming oligonucleotide (if using GSP) and concentration	E	line 174-175, 184-186
Reverse transcriptase and concentration	E	line 174-175, 184-186
Temperature and time	E	line 192
Manufacturer of reagents and catalogue numbers	D	ND
Cqs with and without RT	D*	ND
Storage conditions of cDNA	D	ND
qPCR TARGET INFORMATION
If multiplex, efficiency and LOD of each assay.	E	line 174-180, 184-198
Sequence accession number	E	line 174-180, 184-198
Location of amplicon	D	ND
Amplicon length	E	line 174-180, 184-198
In silico specificity screen (BLAST, etc)	E	line 174-180, 184-198
Pseudogenes, retropseudogenes or other homologs?	D	ND
Sequence alignment	D	ND
Secondary structure analysis of amplicon	D	ND
Location of each primer by exon or intron (if applicable)	E	line 174-180, 184-198
What splice variants are targeted?	E	line 174-180, 184-198
qPCR OLIGONUCLEOTIDES
Primer sequences	E	line186-192
RTPrimerDB Identification Number	D	ND
Probe sequences	D**	ND
Location and identity of any modifications	E	line186-192
Manufacturer of oligonucleotides	D	ND
Purification method	D	ND
qPCR PROTOCOL
Complete reaction conditions	E	line174-177,184-195
Reaction volume and amount of cDNA/DNA	E	line174-177,184-195
Primer, (probe), Mg++ and dNTP concentrations	E	line174-177,184-195
Polymerase identity and concentration	E	line174-177,184-195
Buffer/kit identity and manufacturer	E	line174-177,184-195
Exact chemical constitution of the buffer	D	ND
Additives (SYBR Green I, DMSO, etc.)	E	line174-177,184-195
Manufacturer of plates/tubes and catalog number	D	ND
Complete thermocycling parameters	E	line174-177,184-195
Reaction setup (manual/robotic)	D	ND
Manufacturer of qPCR instrument	E	line174-177,184-195
qPCR VALIDATION
Evidence of optimisation (from gradients)	D	ND
Specificity (gel, sequence, melt, or digest)	E	line194-195
For SYBR Green I, Cq of the NTC	E	line194-195
Standard curves with slope and y-intercept	E	line194-195
PCR efficiency calculated from slope	E	line194-195
Confidence interval for PCR efficiency or standard error	D	ND
r2 of standard curve	E	line177-180,195-198
Linear dynamic range	E	line177-180,195-198
Cq variation at lower limit	E	line177-180,195-198
Confidence intervals throughout range	D
Evidence for limit of detection	E	line177-180,195-198
If multiplex, efficiency and LOD of each assay.	E	line177-180,195-198
DATA ANALYSIS
qPCR analysis program (source, version)	E	line177-180,195-198
Cq method determination	E	supplement data
Outlier identification and disposition	E	supplement data
Results of NTCs	E	supplement data
Justification of number and choice of reference genes	E	line177-180,195-198
Description of normalisation method	E	line177-180,195-198
Number and concordance of biological replicates	D	ND
Number and stage (RT or qPCR) of technical replicates	E	line177-180,195-198
Repeatability (intra-assay variation)	E	line177-180,195-198
Reproducibility (inter-assay variation, %CV)	D	ND
Power analysis	D	ND
Statistical methods for result significance	E	line177-180,195-198
Software (source, version)	E	line177-180,195-198
Cq or raw data submission using RDML	D	supplement data
Table 1. MIQE checklist for authors, reviewers and editors. All essential information (E) must be submitted with the manuscript. Desirable
information (D) should be submitted if available. If using primers obtained from RTPrimerDB, information on qPCR target, oligonucleotides,
protocols and validation is available from that source.
*: Assessing the absence of DNA using a no RT assay is essential when first extracting RNA. Once the sample has been validated as
RDNA-free, inclusion of a no-RT control is desirable, but no longer essential.
**: Disclosure of the probe sequence is highly desirable and strongly encouraged. However, since not all commercial pre-designed assay
vendors provide this information, it cannot be an essential requirement. Use of such assays is advised against.
